# Supplementary material for: Prevalence and Specificity of Chemoreceptor Profiles in Plant-Associated Bacteria
Source: PubMed Central journal article supplement (PMC8547431; doi:10.1128/msystems.00951-21), 2021-09-21
Supplement: msystems.00951-21-st001.pdf [file msystems.00951-21-st001.pdf]

**Table S1. Distribution of LBD types among 'compact' LBD clusters (at least 90% of their sequences sharing the same LBD type).**

| LBD type         | Number of compact clusters | % of clusters over total <sup>a</sup> | Number of LBD sequences with the indicated domain <sup>b</sup> | Average number of LBD sequences per cluster <sup>c</sup> |
|------------------|----------------------------|---------------------------------------|----------------------------------------------------------------|----------------------------------------------------------|
| UNKNOWN clusters | 2316                       | 44.98                                 | 12072                                                          | 5.2                                                      |
| 4HB_MCP_1        | 856                        | 16.62                                 | 10034                                                          | 11.7                                                     |
| dCache_1         | 283                        | 5.50                                  | 9162                                                           | 32.4                                                     |
| TarH             | 84                         | 1.63                                  | 2328                                                           | 27.7                                                     |
| HBM              | 70                         | 1.36                                  | 671                                                            | 9.6                                                      |
| CHASE3           | 66                         | 1.28                                  | 959                                                            | 14.5                                                     |
| PilZ             | 57                         | 1.11                                  | 270                                                            | 4.7                                                      |
| PAS_9            | 55                         | 1.07                                  | 135                                                            | 2.5                                                      |
| PAS_8            | 41                         | 0.80                                  | 350                                                            | 8.5                                                      |
| sCache_2         | 41                         | 0.80                                  | 2134                                                           | 52.0                                                     |
| PilJ             | 34                         | 0.66                                  | 1072                                                           | 31.5                                                     |
| NIT              | 33                         | 0.64                                  | 810                                                            | 24.5                                                     |
| PAS_4            | 32                         | 0.62                                  | 112                                                            | 3.5                                                      |
| Protoglobin      | 32                         | 0.62                                  | 1682                                                           | 52.6                                                     |
| Reg_prop         | 28                         | 0.54                                  | 38                                                             | 1.4                                                      |
| Cache_3-Cache_2  | 27                         | 0.52                                  | 914                                                            | 33.9                                                     |
| CZB              | 27                         | 0.52                                  | 1629                                                           | 60.3                                                     |
| dCache_3         | 22                         | 0.43                                  | 525                                                            | 23.9                                                     |
| sCache_3_3       | 22                         | 0.43                                  | 542                                                            | 24.6                                                     |
| PAS_3            | 21                         | 0.41                                  | 2675                                                           | 127.4                                                    |
| sCache_3_2       | 12                         | 0.23                                  | 142                                                            | 11.8                                                     |
| PAS              | 10                         | 0.19                                  | 29                                                             | 2.9                                                      |
| 7TMR-DISM_7TM    | 8                          | 0.16                                  | 43                                                             | 5.4                                                      |
| CBS              | 8                          | 0.16                                  | 65                                                             | 8.1                                                      |
| CHASE4           | 8                          | 0.16                                  | 23                                                             | 2.9                                                      |
| GAF_2            | 8                          | 0.16                                  | 214                                                            | 26.8                                                     |
| Peripla_BP_4     | 8                          | 0.16                                  | 50                                                             | 6.3                                                      |
| GAF              | 6                          | 0.12                                  | 766                                                            | 127.7                                                    |
| MHYT             | 6                          | 0.12                                  | 36                                                             | 6                                                        |
| dCache_2         | 5                          | 0.10                                  | 11                                                             | 2.2                                                      |
| DUF3365          | 5                          | 0.10                                  | 206                                                            | 41.2                                                     |
| SBP_bac_3        | 5                          | 0.10                                  | 60                                                             | 12                                                       |
| CHASE8           | 4                          | 0.08                                  | 22                                                             | 5.5                                                      |
| cNMP_binding     | 4                          | 0.08                                  | 7                                                              | 1.8                                                      |
| Diacid_rec       | 4                          | 0.08                                  | 90                                                             | 22.5                                                     |
| Phosphonate-bd   | 4                          | 0.08                                  | 74                                                             | 18.5                                                     |
| PocR             | 4                          | 0.08                                  | 166                                                            | 41.5                                                     |
| DUF2222          | 3                          | 0.06                                  | 3                                                              | 1                                                        |
| Fer4             | 3                          | 0.06                                  | 25                                                             | 8.3                                                      |
| FIST             | 3                          | 0.06                                  | 219                                                            | 73                                                       |
| Hemerythrin      | 3                          | 0.06                                  | 276                                                            | 92                                                       |
| Rhodanese        | 3                          | 0.06                                  | 10                                                             | 3.3                                                      |
| 5TM-5TMR_LYT     | 2                          | 0.04                                  | 26                                                             | 13                                                       |
| 7TMR-DISMED2     | 2                          | 0.04                                  | 10                                                             | 5                                                        |
| Ammonium_transp  | 2                          | 0.04                                  | 64                                                             | 32                                                       |
| Fe_hyd_lg_C      | 2                          | 0.04                                  | 124                                                            | 62                                                       |
| FIST_C           | 2                          | 0.04                                  | 220                                                            | 110                                                      |
| GGDEF            | 2                          | 0.04                                  | 2                                                              | 1                                                        |
| HNOB             | 2                          | 0.04                                  | 235                                                            | 117.5                                                    |
| NMT1_2           | 2                          | 0.04                                  | 4                                                              | 2                                                        |
| OpuAC            | 2                          | 0.04                                  | 13                                                             | 6.5                                                      |
| PAS_10           | 2                          | 0.04                                  | 3                                                              | 1.5                                                      |
| PrpR_N           | 2                          | 0.04                                  | 18                                                             | 9                                                        |
| Response_reg     | 2                          | 0.04                                  | 7                                                              | 3.5                                                      |
| SBP_bac_5        | 2                          | 0.04                                  | 64                                                             | 32                                                       |
| T7SS_ESX_EspC    | 2                          | 0.04                                  | 2                                                              | 1                                                        |
| 5_3_exonuc       | 1                          | 0.02                                  | 1                                                              | 1                                                        |
| 5_3_exonuc_N     | 1                          | 0.02                                  | 1                                                              | 1                                                        |
| ABC_sub_bind     | 1                          | 0.02                                  | 1                                                              | 1                                                        |
| ABC_tran         | 1                          | 0.02                                  | 1                                                              | 1                                                        |
| AhpC-TSA         | 1                          | 0.02                                  | 5                                                              | 5                                                        |
| Al-2E_transport  | 1                          | 0.02                                  | 1                                                              | 1                                                        |
| Alanine_zipper   | 1                          | 0.02                                  | 1                                                              | 1                                                        |
| Asparaginase     | 1                          | 0.02                                  | 1                                                              | 1                                                        |
| B12-binding      | 1                          | 0.02                                  | 2                                                              | 2                                                        |
| Bac_globin       | 1                          | 0.02                                  | 6                                                              | 6                                                        |
| Bac_rhodopsin    | 1                          | 0.02                                  | 1                                                              | 1                                                        |
| Band_7           | 1                          | 0.02                                  | 1                                                              | 1                                                        |
| BLUF             | 1                          | 0.02                                  | 1                                                              | 1                                                        |
| bZIP_2           | 1                          | 0.02                                  | 1                                                              | 1                                                        |
| Cas_DxTHG        | 1                          | 0.02                                  | 1                                                              | 1                                                        |
| CBM_4_9          | 1                          | 0.02                                  | 2                                                              | 2                                                        |
| CHASE            | 1                          | 0.02                                  | 1                                                              | 1                                                        |
| DctP             | 1                          | 0.02                                  | 8                                                              | 8                                                        |
| DNA_pol_A_exo1   | 1                          | 0.02                                  | 1                                                              | 1                                                        |
| DUF1640          | 1                          | 0.02                                  | 1                                                              | 1                                                        |
| DUF3235          | 1                          | 0.02                                  | 1                                                              | 1                                                        |
| DUF4077          | 1                          | 0.02                                  | 5                                                              | 5                                                        |

|                 |             |      |              |    |
|-----------------|-------------|------|--------------|----|
| DUF4118         | 1           | 0.02 | 1            | 1  |
| DUF442          | 1           | 0.02 | 1            | 1  |
| DUF948          | 1           | 0.02 | 2            | 2  |
| EAL             | 1           | 0.02 | 1            | 1  |
| EF-hand_11      | 1           | 0.02 | 1            | 1  |
| EMC3_TMCO1      | 1           | 0.02 | 1            | 1  |
| Exonuc_VII_L    | 1           | 0.02 | 1            | 1  |
| Fe-ADH          | 1           | 0.02 | 1            | 1  |
| Fer4_20         | 1           | 0.02 | 3            | 3  |
| FeS             | 1           | 0.02 | 78           | 78 |
| FHIPEP          | 1           | 0.02 | 1            | 1  |
| FRB_dom         | 1           | 0.02 | 1            | 1  |
| GFO_IDH_MocA    | 1           | 0.02 | 6            | 6  |
| Globin          | 1           | 0.02 | 20           | 20 |
| Glyco_hydro_106 | 1           | 0.02 | 1            | 1  |
| Glyco_hydro_2_N | 1           | 0.02 | 1            | 1  |
| H_kinase_N      | 1           | 0.02 | 2            | 2  |
| He_PIG          | 1           | 0.02 | 8            | 8  |
| HHH_5           | 1           | 0.02 | 2            | 2  |
| HTH_ParB        | 1           | 0.02 | 1            | 1  |
| Htr2            | 1           | 0.02 | 7            | 7  |
| IGPD            | 1           | 0.02 | 1            | 1  |
| Ion_trans_2     | 1           | 0.02 | 1            | 1  |
| LXG             | 1           | 0.02 | 1            | 1  |
| MASE3           | 1           | 0.02 | 4            | 4  |
| MASE4           | 1           | 0.02 | 2            | 2  |
| MerR_1          | 1           | 0.02 | 1            | 1  |
| Mut7-C          | 1           | 0.02 | 1            | 1  |
| NADH_4Fe-4S     | 1           | 0.02 | 3            | 3  |
| NMT1            | 1           | 0.02 | 2            | 2  |
| PapC_N          | 1           | 0.02 | 1            | 1  |
| PAS_6           | 1           | 0.02 | 1            | 1  |
| PAS_7           | 1           | 0.02 | 19           | 19 |
| Pentapeptide    | 1           | 0.02 | 1            | 1  |
| Pentapeptide_4  | 1           | 0.02 | 1            | 1  |
| Peripla_BP_3    | 1           | 0.02 | 4            | 4  |
| Peripla_BP_5    | 1           | 0.02 | 1            | 1  |
| Peripla_BP_6    | 1           | 0.02 | 2            | 2  |
| PhoU            | 1           | 0.02 | 1            | 1  |
| Porin_4         | 1           | 0.02 | 1            | 1  |
| Pro_CA          | 1           | 0.02 | 4            | 4  |
| PTS_EIIC        | 1           | 0.02 | 2            | 2  |
| Pyr_redox_2     | 1           | 0.02 | 3            | 3  |
| SBP_bac_1       | 1           | 0.02 | 1            | 1  |
| SBP_bac_8       | 1           | 0.02 | 26           | 26 |
| SDH_alpha       | 1           | 0.02 | 1            | 1  |
| Sensor_TM1      | 1           | 0.02 | 1            | 1  |
| SOR_SNZ         | 1           | 0.02 | 1            | 1  |
| SpollAA-like    | 1           | 0.02 | 1            | 1  |
| SURF1           | 1           | 0.02 | 1            | 1  |
| THF_DHG_CYH     | 1           | 0.02 | 1            | 1  |
| THF_DHG_CYH_C   | 1           | 0.02 | 1            | 1  |
| TnpV            | 1           | 0.02 | 1            | 1  |
| Tox-URI2        | 1           | 0.02 | 1            | 1  |
| TPR_19          | 1           | 0.02 | 4            | 4  |
| Transgly        | 1           | 0.02 | 1            | 1  |
| Ufd2P_core      | 1           | 0.02 | 1            | 1  |
| UPF0184         | 1           | 0.02 | 1            | 1  |
| Usher           | 1           | 0.02 | 1            | 1  |
| VPS28           | 1           | 0.02 | 1            | 1  |
| Vps53_N         | 1           | 0.02 | 1            | 1  |
| Y_Y_Y           | 1           | 0.02 | 10           | 10 |
| YkyA            | 1           | 0.02 | 1            | 1  |
| <b>TOTAL</b>    | <b>4384</b> |      | <b>51741</b> |    |

<sup>a</sup> Percentages are calculated over the total number of LBD clusters (5,149).

<sup>b</sup> Sum of the total number of sequences sharing the same domain type found in the indicated clusters.

<sup>c</sup> 'UNKNOWN clusters' are those with 90% or more of their sequences that did not match to any known domain signature in Pfam.

Distribution of LBD types grouped by domain superfamilies (only the three most abundant superfamilies are shown)

| Domain superfamily | Generic LBD type | Domain model     | % of clusters over total <sup>a</sup> |
|--------------------|------------------|------------------|---------------------------------------|
| 4HB_MCP            | Single 4HB       | 4HB_MCP_1        | 16.62                                 |
|                    |                  | TarH             | 1.63                                  |
|                    |                  | CHASE3           | 1.28                                  |
|                    | Double 4HB       | HBM              | 1.36                                  |
|                    | <b>Subtotal:</b> |                  |                                       |
| Cache-like         | Double Cache     | dCache_1         | 5.50                                  |
|                    |                  | Cache_3-Cache_2  | 0.52                                  |
|                    |                  | dCache_3         | 0.43                                  |
|                    |                  | dCache_2         | 0.10                                  |
|                    | Single Cache     | sCache_2         | 0.80                                  |
|                    |                  | sCache_3_3       | 0.43                                  |
|                    |                  | sCache_3_2       | 0.23                                  |
|                    |                  | Diacid_rec       | 0.08                                  |
|                    |                  | CHASE4           | 0.16                                  |
|                    |                  | CHASE8           | 0.08                                  |
| <b>Subtotal:</b>   |                  |                  | <b>8.31</b>                           |
| PAS                | PAS              | PAS_3            | 0.41                                  |
|                    |                  | PAS_9            | 1.07                                  |
|                    |                  | PAS_4            | 0.62                                  |
|                    |                  | PAS_8            | 0.80                                  |
|                    |                  | PAS              | 0.19                                  |
|                    |                  | PAS_7            | 0.02                                  |
|                    |                  | PAS_10           | 0.04                                  |
|                    |                  | PAS_6            | 0.02                                  |
|                    |                  | <b>Subtotal:</b> |                                       |
