# Supplementary material for: Prevalence and Specificity of Chemoreceptor Profiles in Plant-Associated Bacteria
Source: PubMed Central journal article supplement (PMC8547431; doi:10.1128/msystems.00951-21), 2021-09-21
Supplement: msystems.00951-21-st002.pdf [file msystems.00951-21-st002.pdf]

**Table S2. Distribution of LBD types and domain models in the total LBD dataset.**

| Domain superfamily | LBD type                     | Domain model     | No. of LBDs  | % of each domain model |
|--------------------|------------------------------|------------------|--------------|------------------------|
| 4HB_MCP            | Single 4HB                   | 4HB_MCP_1        | 12754        | 17.597                 |
|                    |                              | TarH             | 2840         | 3.918                  |
|                    |                              | CHASE3           | 1133         | 1.563                  |
|                    | Double 4HB                   | HBM              | 906          | 1.250                  |
|                    | <i>Subtotal:</i>             |                  | <i>17633</i> | <i>24.328</i>          |
| Cache-like         | Double Cache                 | dCache_1         | 11216        | 15.475                 |
|                    |                              | Cache_3-Cache_2  | 1381         | 1.905                  |
|                    |                              | dCache_3         | 598          | 0.825                  |
|                    |                              | dCache_2         | 560          | 0.773                  |
|                    |                              | Ykul_C           | 5            | 0.007                  |
|                    | Single Cache                 | sCache_2         | 4049         | 5.586                  |
|                    |                              | sCache_3_3       | 779          | 1.075                  |
|                    |                              | sCache_3_2       | 179          | 0.247                  |
|                    |                              | Diacid_rec       | 90           | 0.124                  |
|                    |                              | CHASE4           | 35           | 0.048                  |
|                    |                              | CHASE8           | 23           | 0.032                  |
|                    |                              | <i>Subtotal:</i> | <i>18915</i> | <i>26.097</i>          |
|                    |                              | Unknown          | Unknown      | UNKNOWN                |
| PAS                | PAS                          | PAS_3            | 6704         | 9.249                  |
|                    |                              | PAS_9            | 2096         | 2.892                  |
|                    |                              | PAS_4            | 1459         | 2.013                  |
|                    |                              | PAS_8            | 430          | 0.593                  |
|                    |                              | PAS              | 316          | 0.436                  |
|                    |                              | PAS_7            | 19           | 0.026                  |
|                    |                              | PAS_10           | 3            | 0.004                  |
|                    |                              | PAS_6            | 1            | 0.001                  |
|                    |                              | <i>Subtotal:</i> | <i>11028</i> | <i>15.215</i>          |
|                    |                              | GAF              | GAF          | GAF                    |
| GAF_2              | 232                          |                  |              | 0.320                  |
| GAF_3              | 1                            |                  |              | 0.001                  |
| <i>Subtotal:</i>   | <i>1019</i>                  |                  |              | <i>1.406</i>           |
| Protoglobin        | Protoglobin                  | Protoglobin      | 1682         | 2.321                  |
|                    |                              | Globin           | 20           | 0.028                  |
|                    |                              | Bac_globin       | 6            | 0.008                  |
|                    |                              | <i>Subtotal:</i> | <i>1708</i>  | <i>2.357</i>           |
| PBP                | Periplasmic Binding Proteins | Phosphonate-bd   | 74           | 0.102                  |
|                    |                              | SBP_bac_5        | 64           | 0.088                  |
|                    |                              | SBP_bac_3        | 60           | 0.083                  |
|                    |                              | Peripla_BP_4     | 50           | 0.069                  |
|                    |                              | SBP_bac_8        | 36           | 0.050                  |
|                    |                              | OpuAC            | 13           | 0.018                  |
|                    |                              | Peripla_BP_5     | 9            | 0.012                  |
|                    |                              | DctP             | 8            | 0.011                  |
|                    |                              | SBP_bac_1        | 5            | 0.007                  |
|                    |                              | Peripla_BP_3     | 4            | 0.006                  |
|                    |                              | NMT1_2           | 4            | 0.006                  |
|                    |                              | Peripla_BP_6     | 3            | 0.004                  |
|                    |                              | NMT1             | 2            | 0.003                  |
|                    |                              | <i>Subtotal:</i> | <i>332</i>   | <i>0.458</i>           |
| HNOX-like          | Heme and NO binding          | HNOB             | 235          | 0.324                  |
| 4Fe-4S             | Iron-sulfur cluster binding  | FeS              | 78           | 0.108                  |
|                    |                              | Fer4_10          | 54           | 0.075                  |
|                    |                              | Fer4             | 46           | 0.063                  |
|                    |                              | Fer4_7           | 14           | 0.019                  |
|                    |                              | Fer4_9           | 11           | 0.015                  |
|                    |                              | Fer4_6           | 3            | 0.004                  |
|                    |                              | Fer4_20          | 3            | 0.004                  |
|                    |                              | <i>Subtotal:</i> | <i>209</i>   | <i>0.288</i>           |
|                    |                              | GPCR-A           | GPCR-like    | 7TMR-DISM_7TM          |
| NADP-Rossman       | NAD binding                  | GFO_IDH_MocA     | 15           | 0.021                  |
|                    |                              | Semialdehyde_dh  | 4            | 0.006                  |
|                    |                              | <i>Subtotal:</i> | <i>19</i>    | <i>0.026</i>           |
| Gx-transp          | Transporter                  | 5TM-5TMR_LYT     | 26           | 0.036                  |
| Beta-propeller     | Extracellular binding        | Reg_prop         | 38           | 0.052                  |
| GBD                | Galactose binding            | 7TMR-DISMED2     | 10           | 0.014                  |
|                    |                              | CBM_4_9          | 2            | 0.003                  |
|                    |                              | <i>Subtotal:</i> | <i>12</i>    | <i>0.017</i>           |
| TPR                | Protein-Protein interactions | TPR_19           | 6            | 0.008                  |

|                         |                             |                  |          |              |
|-------------------------|-----------------------------|------------------|----------|--------------|
|                         |                             | ANAPC3           | 1        | 0.001        |
|                         |                             | <i>Subtotal:</i> | <i>7</i> | <i>0.010</i> |
| Cupin                   | Nucleotide binding          | cNMP_binding     | 7        | 0.010        |
| HHH                     | Helix-turn-Helix            | HHH_5            | 2        | 0.003        |
| E-set                   | Sugar binding               | Y_Y_Y            | 10       | 0.014        |
| Phosphatase             | Cyanide binding             | Rhodanese        | 10       | 0.014        |
| P-loop-NTPase           | Nucleotide binding          | ABC_tran         | 1        | 0.001        |
|                         |                             | ABC_sub_bind     | 1        | 0.001        |
|                         |                             | <i>Subtotal:</i> | <i>2</i> | <i>0.003</i> |
| No assigned superfamily | Zinc binding                | CZB              | 1629     | 2.248        |
|                         | PilJ                        | PilJ             | 1095     | 1.511        |
|                         | Nitrate and nitrite binding | NIT              | 923      | 1.273        |
|                         | Oxygen binding              | Hemerythrin      | 276      | 0.381        |
|                         |                             | PocR             | 166      | 0.229        |
|                         | c-di-GMPbinding             | PilZ             | 270      | 0.373        |
|                         | Amino acid binding          | FIST_C           | 220      | 0.304        |
|                         |                             | FIST             | 219      | 0.302        |
|                         | Domain of unknown function  | DUF3365          | 213      | 0.294        |
|                         | Hydrogen binding            | Fe_hyd_lg_C      | 124      | 0.171        |
|                         | Adenosyl group binding      | CBS              | 65       | 0.090        |
|                         | Ammonium transporter        | Ammonium_transp  | 64       | 0.088        |
|                         | Integral membrane sensor    | MHYT             | 36       | 0.050        |
|                         | Ligand binding              | PrpR_N           | 18       | 0.025        |
|                         | Putative LBD                | He_PIG           | 8        | 0.011        |
|                         | Putative LBD                | Response_reg     | 7        | 0.010        |
|                         | Putative LBD                | Htr2             | 7        | 0.010        |
|                         | Domain of unknown function  | DUF4077          | 5        | 0.007        |
|                         | Putative LBD                | AhpC-TSA         | 5        | 0.007        |
|                         | Putative LBD                | Pro_CA           | 4        | 0.006        |
|                         | Integral membrane domain    | MASE3            | 4        | 0.006        |
|                         | Putative LBD                | DapB_N           | 4        | 0.006        |
|                         | Putative LBD                | Pyr_redox_2      | 3        | 0.004        |
|                         | Putative LBD                | NADH_4Fe-4S      | 3        | 0.004        |
|                         | Putative LBD                | H_kinase_N       | 3        | 0.004        |
|                         | Domain of unknown function  | DUF2222          | 3        | 0.004        |
|                         | Putative LBD                | TPR_16           | 2        | 0.003        |
|                         | Putative LBD                | T7SS_ESX_EspC    | 2        | 0.003        |
|                         | Phosphate/sugar binding     | PTS_EIIC         | 2        | 0.003        |
|                         | Putative LBD                | MASE4            | 2        | 0.003        |
|                         | Putative LBD                | GGDEF            | 2        | 0.003        |
|                         | Domain of unknown function  | DUF948           | 2        | 0.003        |
|                         | Putative LBD                | B12-binding      | 2        | 0.003        |
|                         | Putative LBD                | AIP3             | 2        | 0.003        |
|                         | Putative LBD                | YkyA             | 1        | 0.001        |
|                         | Putative LBD                | Vps53_N          | 1        | 0.001        |
|                         | Putative LBD                | VPS28            | 1        | 0.001        |
|                         | Putative LBD                | Usher            | 1        | 0.001        |
|                         | Putative LBD                | UPF0184          | 1        | 0.001        |
|                         | Putative LBD                | Ufd2P_core       | 1        | 0.001        |
|                         | Putative LBD                | Transgly         | 1        | 0.001        |
|                         | Putative LBD                | Tox-URI2         | 1        | 0.001        |
|                         | Putative LBD                | TnpV             | 1        | 0.001        |
|                         | Putative LBD                | THF_DHG_CYH_C    | 1        | 0.001        |
|                         | Putative LBD                | THF_DHG_CYH      | 1        | 0.001        |
|                         | Putative LBD                | SURF1            | 1        | 0.001        |
|                         | Putative LBD                | SpoIIAA-like     | 1        | 0.001        |
|                         | Putative LBD                | SOR_SNZ          | 1        | 0.001        |
|                         | Putative LBD                | Sensor_TM1       | 1        | 0.001        |
|                         | Putative LBD                | SDH_alpha        | 1        | 0.001        |
|                         | Putative LBD                | Porin_4          | 1        | 0.001        |
|                         | Putative LBD                | PhoU             | 1        | 0.001        |
|                         | Putative LBD                | Pentapeptide_4   | 1        | 0.001        |
|                         | Putative LBD                | Pentapeptide     | 1        | 0.001        |
|                         | Putative LBD                | PapC_N           | 1        | 0.001        |
|                         | Putative LBD                | OMS28_porin      | 1        | 0.001        |
|                         | Putative LBD                | NAD_binding_3    | 1        | 0.001        |
|                         | Putative LBD                | Mut7-C           | 1        | 0.001        |
|                         | Putative LBD                | MerR_1           | 1        | 0.001        |
|                         | Putative LBD                | LXG              | 1        | 0.001        |
|                         | Putative LBD                | Lipoprotein_7    | 1        | 0.001        |
|                         | Putative LBD                | Ion_trans_2      | 1        | 0.001        |
|                         | Putative LBD                | ING              | 1        | 0.001        |
|                         | Putative LBD                | IGPD             | 1        | 0.001        |
|                         | Putative LBD                | IclR             | 1        | 0.001        |
|                         | Putative LBD                | HTH_ParB         | 1        | 0.001        |
|                         | Putative LBD                | Glyco_hydro_2_N  | 1        | 0.001        |
|                         | Putative LBD                | Glyco_hydro_106  | 1        | 0.001        |
|                         | Putative LBD                | FRB_dom          | 1        | 0.001        |
|                         | Putative LBD                | FHIPEP           | 1        | 0.001        |
|                         | Putative LBD                | Fe-ADH           | 1        | 0.001        |
|                         | Putative LBD                | F420_oxidored    | 1        | 0.001        |
|                         | Putative LBD                | Exonuc_VII_L     | 1        | 0.001        |

|                            |                  |             |             |
|----------------------------|------------------|-------------|-------------|
| Putative LBD               | EMC3_TMCO1       | 1           | 0.001       |
| Putative LBD               | EF-hand_11       | 1           | 0.001       |
| Putative LBD               | EAL              | 1           | 0.001       |
| Domain of unknown function | DUF442           | 1           | 0.001       |
| Domain of unknown function | DUF4118          | 1           | 0.001       |
| Domain of unknown function | DUF3235          | 1           | 0.001       |
| Domain of unknown function | DUF1640          | 1           | 0.001       |
| Putative LBD               | DNA_pol_A_exo1   | 1           | 0.001       |
| Putative LBD               | CHASE            | 1           | 0.001       |
| Putative LBD               | Cas_DxTHG        | 1           | 0.001       |
| Putative LBD               | bZIP_2           | 1           | 0.001       |
| Putative LBD               | BLUF             | 1           | 0.001       |
| Putative LBD               | Band_7           | 1           | 0.001       |
| Putative LBD               | Bac_rhodopsin    | 1           | 0.001       |
| Putative LBD               | Asparaginase     | 1           | 0.001       |
| Putative LBD               | Alanine_zipper   | 1           | 0.001       |
| Quorum sensing             | AI-2E_transport  | 1           | 0.001       |
| Putative LBD               | 5_3_exonuc_N     | 1           | 0.001       |
| Putative LBD               | 5_3_exonuc       | 1           | 0.001       |
| Putative LBD               | 2CSK_N           | 1           | 0.001       |
|                            | <i>Subtotal:</i> | <i>5449</i> | <i>7.52</i> |
| <hr/>                      |                  |             |             |
|                            | TOTAL:           | 72480       | 100         |
